# Supplementary material
Source: publisher figshare collection journal article supplement (https://gsapubs.figshare.com/ndownloader/files/39478045)
Supplement: Supplementary file 1 [file 39478045]

## Sheet: Sheet1
Table S9 Compilations of the Whole-rock geochemical and isotopic compositions of the volcanic rocks from the Northern Yili Block
sample No.	Sample Name	Age	SiO2	TiO2	Al2O3	Fe2O3T	MnO	MgO	CaO	Na2O	K2O	P2O5	L.O.I	Total	K2O/Na2O	A/CNK	ANK	Mg#		Th	Nb	Ba	Zr	Hf	Pb	La	Ce	Pr	Nd	Sm	Eu	Gd	Tb	Dy	Ho	Er	Tm	Yb	Lu	Sr	Y	Hf/Nd	Th/Nd	Ba/La	Nd/Sr		87Rb/86Sr	87Sr/86Sr	(2σ)
YM2-1	Andesite	386.4	61.75	0.87	17.1	6.42	0.11	2.08	4.86	3.5	1.67	0.12		98.48	0.477143	1.0426	2.26034	43.0217		5.94	7.74	355.7	283.1	7.62	4.67	21.29	41.84	5.46	21.17	4.1	1.25	4.24	0.71	4.38	0.9	2.62	0.41	2.81	0.42	308.1	22.2	0.359943	0.280586	16.7074	0.0687115		0.548858	0.712784	7.8e-05
YM4	Andesite	386.4	61.09	0.88	17.16	6.37	0.09	2.19	5.31	3.72	1.78	0.12		98.71	0.478495	0.969469	2.13268	44.4822		6.05	7.76	320	297.6	7.68	6.72	19.57	41.37	5.31	21.97	4.28	1.31	4.34	0.73	4.69	0.93	2.74	0.44	3.06	0.46	320	24.19	0.349568	0.275376	16.3516	0.0686563		0.580664	0.712581	1.5e-05
JX1-1	Andesite	386.4	62.69	0.95	17.29	5.69	0.07	1.35	5.57	3.23	1.65	0.13		98.62	0.510836	1.0037	2.43541	35.6056		5.75	8.07	334.2	315.3	8	12.88	18.61	42.46	5.25	21.8	4.48	1.3	4.15	0.74	4.65	0.91	2.72	0.42	3	0.42	204.5	22.69	0.366972	0.263761	17.9581	0.106601		0.693891	0.714105	1.5e-05
JX3-1	Andesite	386.4	62.49	0.8	17.28	6.04	0.09	1.38	4.19	4.15	1.76	0.13		98.31	0.424096	1.05689	1.97894	34.7457		6.1	8.24	430.9	311.4	8.19	9.65	18.92	38.18	5.49	20.94	4.5	1.32	4.38	0.75	4.7	1	2.8	0.47	2.96	0.47	265.7	25.41	0.391117	0.291309	22.7748	0.0788107		0.581704	0.712928	1.4e-05
YM11-1	Andesite	370.5	68.34	0.14	17.43	1.1	0.02	0.75	1.74	7.66	0.53	0.05	2.3	100.1	0.0691906	1.06682	1.32299	61.3747		0.33	1.88	139.4	95.41	2.91	11.69	1.29	2.59	0.38	1.55	0.34	0.15	0.35	0.06	0.31	0.07	0.19	0.03	0.25	0.04	288.8	2.01	1.87742	0.212903	108.062	0.00536704		0.110753	0.704394	1.1e-05
YM11-6	Andesite	370.5	68.73	0.14	17.31	1.3	0.02	1.02	0.67	8.48	0.61	0.05	1.91	100.3	0.071934	1.0936	1.18478	64.6461		0.21	1.95	124.8	100.3	2.92	10.95	0.87	1.1	0.3	1.29	0.28	0.13	0.28	0.05	0.31	0.07	0.19	0.03	0.22	0.03	163.5	1.83	2.26357	0.162791	143.448	0.00788991		0.133402	0.704316	1.2e-05
06XJ-30	Andesite	347	63.85	0.48	15.9	3.77	0.05	2.51	0.7	2.04	5.92	0.08	3.99	99.3	2.90196	57	1.44071	1.62577		4.96	5.83	368	149	3.66	13.94	13.6	27.4	3.19	11.5	2.18	0.601	1.86	0.3	1.7	0.366	1.07	0.167	1.12	0.175	235	9.86	0.318261	0.431304	27.0588	0.0489362		2.769	0.717664	1.7e-05
06XJ-31	Andesite	347	62.02	0.67	16.01	5.03	0.07	3.79	0.98	4.87	2.17	0.08	3.75	99.43	0.445585	60	1.31858	1.54438		4.76	6.92	345	176	4.19	14.17	12.7	28.1	3.42	12.8	2.71	0.736	2.34	0.368	2.06	0.445	1.25	0.183	1.24	0.199	354	12.2	0.327344	0.371875	27.1654	0.0361582		0.686	0.708597	1.4e-05
06XJ-32	Andesite	347	58.94	0.81	15.39	5.91	0.1	6.59	2.51	4.63	1.64	0.11	3.72	100.35	0.354212	69	1.10282	1.63781		4.75	9.07	299	159	3.61	15.95	13.4	27.6	3.33	12.6	2.74	0.884	2.56	0.428	2.54	0.513	1.49	0.207	1.53	0.222	686	14.3	0.286508	0.376984	22.3134	0.0183673		0.22	0.705552	1.7e-05
TST071-1	Basaltic andesite	360	54.71	1.29	16.95	7.92315	0.17	3.62	4.55	3.46	2.23	0.31	4.08	99.71	0.644509	1.03357	2.08949	51.5687		10.49	25.18	577	245.9	5.37	11.91	30.18	64.78	8.02	31.93	6.65	1.66	6.23	1.03	6.26	1.25	3.51	0.56	3.59	0.53	422	33.69	0.16818	0.328531	19.1186	0.0756635		0.396	0.707785
TST086-0	Dacite	360	74.15	0.34	13.83	2.30054	0.05	0.27	0.3	4.44	2.84	0.08	0.87	99.71	0.63964	1.26502	1.33157	21.4772		13.42	14.51	754.6	311.9	7.53	5.61	22.69	50.59	6.67	26.53	5.82	1.04	5.52	1.07	6.84	1.42	4.35	0.75	5.03	0.77	83.4	42.44	0.28383	0.505842	33.2569	0.318106		1.714	0.71304
TST071-2	Andesitic clasticrock	360	77.37	0.52	11.84	2.68247	0.04	0.41	0.39	0.1	3.44	0.12	2.6	99.78	34.4	2.56965	3.03801	26.2648		10.05	23.52	1362.7	324.9	6.47	9.05	33.16	77.06	9.5	35.45	6.01	1.32	5.18	0.84	4.93	0.97	2.82	0.47	3.03	0.46	74.1	26.94	0.182511	0.283498	41.0947	0.478408		3.705	0.723764
TST086-1	Dacite	360	70.46	0.61	14.89	2.87541	0.11	0.81	0.64	3.95	3.7	0.14	1.31	99.79	0.936709	1.27494	1.4163	39.6317		14.17	14.11	888.6	323.7	7.35	11.08	30.11	63.33	7.79	30.3	6.28	1.4	5.85	1	6.26	1.28	3.74	0.63	4.16	0.62	177.1	36.82	0.242574	0.467657	29.5118	0.17109		1.661	0.712459
TST087-1	Andesite tuff	360	65.54	0.55	15.79	3.92441	0.12	1.92	2.64	2.63	3.62	0.11	2.58	99.74	1.37643	1.20872	1.91281	53.2751		12.05	11.14	614	173.6	4.65	13.04	19.71	46.2	5.85	22.64	4.56	1.26	4.1	0.71	4.31	0.85	2.5	0.41	2.83	0.39	284.1	23.41	0.205389	0.532244	31.1517	0.0796902		1.386	0.71166
TST087-2	Dacite	360	70.07	0.49	14.26	3.40247	0.11	1.41	2.31	2.61	2.83	0.08	2.16	99.99	1.08429	1.23226	1.93626	49.1294		10.85	9.18	566.6	166.7	4.31	14.62	18.49	39.53	4.82	18.09	3.68	0.96	3.37	0.58	3.7	0.75	2.21	0.37	2.53	0.37	288.3	20.32	0.238253	0.599779	30.6436	0.0627471		1.102	0.710684
TS31-2	Andesitic breccia	360	61.3	0.91	13.55	4.92191	0.09	3.2	4.66	1.82	2.86	0.24	5.65	99.9	1.57143	0.929008	2.22219	60.2415		8.2	11.7	470	162.5	4.6	7.3	20.1	49.3	5.3	20.9	4.6	1.3	4.83	0.8	4.42	0.88	2.6	0.4	2.51	0.38	114.5	26	0.220096	0.392344	23.3831	0.182533		6.406	0.738708
TS35-3	Rhyolite	360	68.1	0.76	12.7	4.16607	0.08	1.62	4.8	2.66	1.43	0.16	2.49	99.57	0.537594	0.865672	2.14244	47.5404		12.4	16.2	270	191.5	5.5	17.1	31.1	68.1	7.64	29.5	5.93	1.34	5.8	0.85	4.97	1	2.93	0.42	2.75	0.4	241	30.4	0.186441	0.420339	8.68167	0.122407		0.869	0.711764
TS35-4	Andesite tuff	360	61	1	13.6	5.04788	0.1	2.99	4.41	2.01	2.71	0.24	5.54	99.25	1.34826	0.952387	2.1769	57.9906		8	12	340	160.5	4.5	19.1	21.9	50.4	5.46	21.6	4.55	1.2	4.72	0.71	4.2	0.84	2.5	0.36	2.41	0.36	105.5	24.7	0.208333	0.37037	15.5251	0.204739		2.255	0.717737
TS35-5	Andesite tuff	360	61.5	0.58	18.75	3.05032	0.08	4.81	0.58	1.8	3.11	0.1	5.27	100.1	1.72778	2.53639	2.95929	78.6093		9.6	16.3	440	293	9	17.4	19.1	50.4	6	24.3	5.18	1.25	5.42	0.83	5.1	1.05	3.3	0.5	3.42	0.53	38.2	26.9	0.37037	0.395062	23.0366	0.636126		2.969	0.721378
TS35-6	Andesite tuff	360	61.5	0.56	18.05	2.87936	0.09	4.79	0.48	2.09	3.17	0.08	5.2	99.34	1.51675	2.32829	2.62424	79.4953		8.7	16.7	460	296	8.8	22.3	15.4	39.8	4.51	18.9	4.63	1.2	5.5	0.92	5.72	1.2	3.76	0.56	3.76	0.6	35.7	32.4	0.465608	0.460317	29.8701	0.529412		0.19	0.707581
TS35-7	Basaltic trachyandesite	360	53.5	0.78	15.25	5.8667	0.1	4.09	5.71	3.74	1.36	0.17	7.05	101.15	0.363636	0.845859	1.99904	61.9007		5.5	6.7	70	150.5	4.1	25.8	18.3	41.4	4.63	18.4	3.99	1.1	4.12	0.61	3.64	0.73	2.21	0.31	2.1	0.32	230	21.8	0.222826	0.298913	3.82514	0.08		4.26	0.727596
TS21-1	Basalt	360	51.7	1.22	16.05	9.25894	0.15	5.56	4.82	3.35	2.72	0.25	3.4	99.74	0.81194	0.930863	1.89654	58.3241		4.5	10.6	750	157	4.9	11.1	12	32.4	4.15	18.3	4.91	1.21	5.8	0.95	5.97	1.23	3.82	0.57	3.93	0.6	374	37.9	0.26776	0.245902	62.5	0.0489305		3.341	0.722226
TS30	Basaltic andesite	360	53.18	0.87	15.64	8.40591	0.21	4.61	7.92	3.19	2.06	0.25	3.13	100.01	0.645768	0.713859	2.08996	49.4332		6.58	8.09	242.8	151.3	4.49	21.8	21.86	45.5	5.72	22.33	5.19	1.23	4.99	0.8	4.7	0.96	2.6	0.4	2.54	0.38	294.4	24.9	0.201075	0.294671	11.107	0.0758492		0.4244	0.709776	1e-05
TS037	Trachyte	360	65.06	0.72	15.3	5.24583	0.1	1.48	1.57	5.15	2.49	0.26	1.75	99.72	0.483495	1.0902	1.36919	33.4622		10.29	24.63	809.3	309.1	8.3	35.6	45.94	88.58	10.5	38.03	7.88	1.74	6.61	1.03	5.96	1.23	3.52	0.54	3.48	0.53	343.3	33.74	0.218249	0.270576	17.6165	0.110778		0.6591	0.713152	1.2e-05
TS039	Trachyy-andesite	360	61.35	0.6	15.62	6.8482	0.16	2.19	2.01	4.18	4.12	0.26	1.79	99.53	0.985646	1.04074	1.37653	36.3074		9.9	23.58	777.4	305	8.23	40	30.92	70.4	8.26	31.91	6.97	1.55	6.39	1.01	6.27	1.23	3.49	0.53	3.46	0.53	312.6	33.73	0.257913	0.310248	25.1423	0.102079		1.398	0.715767	1.2e-05
TS040	Trachyy-andesite	360	60.52	0.76	15.62	7.13714	0.23	2.42	2.12	4.13	4.27	0.29	1.62	99.55	1.0339	1.02163	1.36683	37.6717		10.84	24.97	803.5	318.5	8.46	27.5	45.41	90.12	10.63	39.92	8.2	1.98	7.21	1.08	6.45	1.28	3.7	0.55	3.59	0.56	356.6	34.07	0.211924	0.271543	17.6943	0.111946		0.7119	0.713251	1.2e-05
TS041	Trachyy-andesite	360	62.52	0.64	15.98	5.72437	0.19	1.11	1.51	4.62	4.25	0.35	2.67	99.88	0.919913	1.06799	1.30851	25.6863		9.69	22.28	713.3	295.2	7.82	24.7	35.61	74.72	9.23	34.83	7.15	1.49	6.21	0.99	5.79	1.2	3.31	0.52	3.34	0.51	187.2	31.04	0.224519	0.278208	20.0309	0.186058		1.83	0.718846	1.5e-05
TS031	Basalt	360	44.68	1.52	12.91	12.4037	0.31	10.68	12.35	2.08	0.69	0.26	1.25	99.79	0.331731	0.48415	3.09543	60.5495		6.21	7.43	615.4	146.2	4.25	21.7	17.48	35.08	4.34	17.24	4.09	1.14	3.94	0.65	3.89	0.82	2.37	0.39	2.51	0.39	266	21.16	0.24652	0.360209	35.2059	0.064812		0.7919	0.711461	1e-05
TS032	Basaltic andesite	360	55.61	0.86	13.15	6.8174	0.25	4.54	9.24	3.22	1.97	0.26	2.81	99.03	0.611801	0.541931	1.76864	54.2767		9.2	12.74	681.4	253	7.09	14.8	26.36	57.27	7.27	28.67	6.48	1.53	6.1	0.99	5.72	1.17	3.18	0.49	3.22	0.49	432.8	29.62	0.247297	0.320893	25.8498	0.0662431		0.4173	0.710953	1.1e-05
TS033	Basalt	360	51.82	0.67	15.81	6.8984	0.34	5.09	10.61	3.01	1.54	0.22	2.81	99.12	0.511628	0.609287	2.38714	56.8081		6.68	8	291.2	153	4.53	13.7	21.67	44.54	5.57	21.94	5.14	1.24	4.98	0.8	4.82	1.01	2.78	0.44	2.84	0.43	554.7	25.86	0.206472	0.304467	13.4379	0.0395529		0.0671	0.708068	1e-05
TS034	Basalt	360	45.22	1.67	12.45	12.0477	0.44	10.24	12.55	2.11	0.77	0.28	1.22	99.65	0.364929	0.458298	2.89076	60.2397		6.95	8.5	450.2	156.8	4.7		21.17	44.85	5.66	22.4	5.21	1.34	5.03	0.82	4.89	1.02	2.89	0.44	2.86	0.44	445.6	26.48	0.209821	0.310268	21.2659	0.0502693		0.1637	0.708632	1e-05
TS035	Basalt	360	46.22	1.33	12.91	12.5734	0.32	6.16	12.31	2.41	0.92	0.26	3.64	99.88	0.381743	0.471427	2.60118	46.6185		5.48	7.31	315.9	133	3.94		19.94	39.81	4.92	18.98	4.38	1.03	4	0.66	3.99	0.83	2.4	0.37	2.37	0.37	272	22.83	0.207587	0.288725	15.8425	0.0697794		0.6216	0.710496	1.2e-05
TS076	Basalt	360	49.16	0.95	13.24	9.57822	0.2	10.03	10.61	1.88	0.94	0.21	2.33	99.52	0.5	0.564888	3.21914	65.1156		2.47	4.18	142.3	74.83	2.18		10.28	21.86	3.01	12.86	3.28	0.89	3.21	0.54	3.21	0.61	1.8	0.27	1.5	0.24	377.8	15.44	0.169518	0.192068	13.8424	0.0340392		0.1344	0.705544	1.2e-05
TS082	Basalt	360	47.74	1.12	12.69	10.0527	0.16	11.23	8.97	1.95	0.75	0.22	3.87	99.39	0.384615	0.623278	3.15523	66.5696		2.57	3.67	195.9	72.51	2.21		9.18	19.83	3.27	12.28	3.1	0.89	3.12	0.53	3.13	0.61	1.77	0.27	1.45	0.23	331.3	15.59	0.179967	0.209283	21.3399	0.0370661		0.2026	0.705981	1.3e-05
TS088b	Basalt	360	49.05	1.01	11.21	2.71	0.13	12.61	9.45	2.22	0.88	0.16	2.54	99.51	0.396396	0.513757	2.43317	89.2408		2.36	5.48	229.1	89.92	2.69		9.27	20.75	3.27	11.6	3.22	0.92	3.51	0.58	3.53	0.68	2.11	0.27	1.57	0.25	395.1	16.34	0.231897	0.203448	24.7141	0.0293597		0.0765	0.706259	1.2e-05
TS096	Trachy-andesite	360	60.5	0.77	15.77	1.97	0.08	2.18	3.31	6.33	2.29	0.26	3.27	99.46	0.361769	0.833171	1.2226	66.3589		12.99	12.22	627.7	194.5	5.55		30.25	62.39	7.58	29.01	6.11	1.32	5.07	0.85	5.12	1.07	2.9	0.44	2.74	0.42	237.3	26.34	0.191313	0.447777	20.7504	0.12225		0.5721	0.709616	1.1e-05
TS097	Trachy-andesite	360	57.38	0.96	15.3	5.83	0.12	4.04	4.39	4.1	2.81	0.14	2.64	99.72	0.685366	0.860015	1.56213	55.262		5.77	11.05	451.1	165.8	4.91		15.06	33.05	4.19	17.02	4.03	1.19	4.06	0.66	3.88	0.72	1.98	0.3	1.94	0.3	483.2	17.91	0.288484	0.339013	29.9535	0.0352235		0.3643	0.70688	1e-05
TS99	Trachy-andesite	360	58.08	0.94	13.1	5.57	0.11	5.4	5.7	2.81	2.92	0.08	2.29	99.59	1.03915	0.720828	1.68134	63.3449		4.66	13.52	434.4	130	3.53		16.01	33.82	4.15	17.33	3.94	1.21	4.03	0.64	3.8	0.78	2.25	0.33	2.11	0.32	393.3	20.32	0.203693	0.268898	27.133	0.0440631		0.326	0.706076	1.1e-05
TS107	Basaltic trachy-andesite	360	52.2	1.14	15.33	4.29	0.22	6.96	5.78	5.28	0.85	0.21	2.3	99.4	0.160985	0.761298	1.59541	74.3059		3.2	4.73	515.8	112.9	3.19		11.13	25.69	3.56	14.35	4.37	1.21	4.21	0.72	4.49	0.96	2.67	0.4	2.39	0.38	813.5	24.99	0.2223	0.222997	46.3432	0.0176398		0.0571	0.705964	1.1e-05
TS191	Rhyolite	360	74.4	0.2	12.19	1.99	0.04	0.04	0.4	2.08	7.9	0.02	0.51	100.11	3.79808	0.958119	1.01632	3.45905		13.29	11.31	1011	369.1	8.01		30.95	78.01	9.73	37.4	9.12	2.01	7.65	1.42	9.37	1.98	5.66	0.88	5.51	0.87	222.9	26.18	0.214171	0.355348	32.6656	0.167788		2.586	0.715703	1.1e-05
TS194	Trachy-andesite	360	58.41	1.01	15.02	4.13	0.18	1.56	5.01	2.98	2.89	0.43	2.51	99.4	0.969799	0.875093	1.8685	40.2381		13.06	11.52	501.7	300.6	8.23		26.89	58.39	6.47	24.26	6.11	1.18	5.16	1.03	6.97	1.51	4.57	0.76	5.16	0.79	235.3	24.31	0.339242	0.538335	18.6575	0.103102		3.517	0.719711	1.2e-05
TS197b	Trachyte	360	65.12	0.59	15.02	4.45	0.09	1.11	1.21	5.22	4.82	0.32	1.72	100.35	0.923372	0.937468	1.08699	30.7782		10.11	7.8	337.9	231.8	5.97		14.05	33.87	4.27	16.73	4.24	1.08	4.09	0.71	4.06	0.79	2.22	0.32	1.97	0.31	148.7	22.87	0.356844	0.604304	24.0498	0.112508		4.536	0.724115	1.1e-05
TS200	Basaltic trachy-andesite	360	55.68	0.72	17.19	4.36	0.23	4.93	2.62	5.28	3.68	0.27	3.07	100.64	0.69697	0.984999	1.35572	66.8388		11.16	6.62	532	205.4	5.59		16.82	41.75	5.55	22.42	5.49	1.18	4.67	0.7	4.21	0.85	2.36	0.36	2.5	0.41	192.9	22.47	0.249331	0.49777	31.629	0.116226		2.622	0.716443	1e-05
TS207	Trachy-andesite	360	59.58	0.75	16.58	6.19	0.23	3.09	1.71	4.1	4.72	0.12	2.07	99.98	1.15122	1.1067	1.39717	47.0851		7.77	10.84	814	141.4	4.25		30.89	50.24	6.91	26.14	5.95	1.86	5.69	0.91	5.55	1.03	2.93	0.48	3.07	0.48	679.7	20.36	0.162586	0.297246	26.3516	0.0384581		0.6938	0.708559	1.3e-05
TS007	Dacite	360	66.04	0.68	15.08	5.3	0.09	1.66	1.72	5.08	1.82	0.13	2.19	99.79	0.358268	1.11993	1.4595	35.8276											19.81	4.79										258.7		0	0	0	0.0765752		0.5135	0.706948	1e-05
TS010	Andesite	360	62.15	0.81	16.34	6.82	0.13	2.03	2.42	4.18	2.28	0.18	2.44	99.77	0.545455	1.18761	1.74744	34.6652											27.46	6.3										349.5		0	0	0	0.0785694		0.437	0.706836	9e-06
TS017	Rhyolite	360	71.32	0.33	13.64	2.99	0.09	1.26	0.52	4.39	3.15	0.07	1.42	99.47	0.71754	1.17713	1.28191	42.8953		26.28	7.48	970.7	147.3	4.89		19.18	37.47	4.27	15.15	3.05	0.69	2.87	0.43	2.56	0.53	1.64	0.31	2.11	0.35	73.84	15.79	0.322772	1.73465	50.61	0.205173		9.272	0.744111	2.8e-05
TS018	Rhyolite	360	70.7	0.41	13.91	3.21	0.09	1.42	0.57	4.36	3.18	0.18	1.63	99.98	0.729358	1.19279	1.30936	44.0883		13.1	6.45	501	134.6	4.33		12.67	27.51	3.35	12.88	2.9	0.56	3.01	0.49	3.19	0.72	2.2	0.38	2.48	0.39	61.63	19.89	0.33618	1.01708	39.5422	0.208989		1.322	0.71106	4.3e-05
TS022	Andesite	360	61.92	0.76	16.11	3.32	0.22	3.22	4.56	2.16	2.61	0.13	2.15	99.84	1.20833	1.09656	2.52283	63.3544		17.23	11.39	676.3	255.4	7.06		30.01	67	8.8	36.27	8.55	1.71	7.7	1.15	6.52	1.35	3.75	0.57	3.73	0.58	78.84	35.4	0.194651	0.475048	22.5358	0.460046		30.53	0.840988	2e-05
C14BL22	Ignimbrite	300	65.8	0.28	13.85	5.87	0.11	0.18	2.61	3.43	3.08	0.07	3.67	99	0.897959	1.00936	1.54145	6.6697		6.79	6.43	325	642	13.2	6.77	35.5	74.2	9.56	42.3	9.06	1.8	9.1	1.65	9.77	2.02	6.01	0.911	6.29	0.917	107	60.4	0.312057	0.16052	9.15493	0.395327		2.84147	0.719545	7.67439e-06
C14BL25	Ignimbrite	300	71.5	0.19	13.7	4.23	0.02	0.17	0.72	4.22	2.55	0.04	1.72	99.1	0.604265	1.24419	1.41097	8.56397		8.44	8.67	359	468	10.4	10.1	50	104	13	55.5	10.8	1.64	10.67	1.82	10.4	2.13	6.48	0.962	6.31	0.918	78	63.6	0.187387	0.152072	7.18	0.711538		2.86218	0.718293	6.46301e-06
C14BL06	Ignimbrite	304	73	0.26	12.9	1.99	0.03	0.24	1.28	3.15	4.37	0.04	1.74	99	1.3873	1.054	1.29986	21.94		11.8	7.13	545	229	5.81	6.91	27.8	58.7	7.48	29.1	6.2	0.61	6.19	1.1	6.47	1.34	3.99	0.592	3.73	0.573	54.7	40.8	0.199656	0.405498	19.6043	0.531993		7.46397	0.739553	6.67874e-06
C14BL09	Ignimbrite	304	72.9	0.25	12.9	1.88	0.02	0.22	1.31	3.19	4.4	0.03	1.84	98.9	1.37931	1.041	1.2871	21.428		11.6	6.92	558	223	6.27	7.61	28.6	59.1	7.32	29.6	6.19	0.63	6.09	1.09	6.64	1.39	4.29	0.606	3.73	0.587	62.1	39.6	0.211824	0.391892	19.5105	0.476651		6.29477	0.735251	7.43101e-06
C14BL17	Ignimbrite	304	74	0.27	12.85	1.63	0.03	0.2	1.4	3.13	4.36	0.04	1.82	99.7	1.39297	1.03516	1.30055	22.2365		11.9	7.16	568	242	6.26	4.53	27.6	57.1	7.14	28.3	6.03	0.59	5.91	1.1	6.45	1.37	4.11	0.613	3.79	0.598	65.7	40.9	0.221201	0.420495	20.5797	0.430746		5.90578	0.732664	6.14169e-06
C14BL20	Ignimbrite	304	72.9	0.26	12.75	2.07	0.03	0.25	1.4	3.33	4.14	0.03	1.78	98.9	1.24324	1.01964	1.27874	21.9641		12.2	7.45	497	243	5.99	19	29.3	63	7.61	30.9	6.51	0.67	6.33	1.19	6.95	1.43	4.11	0.631	4.05	0.576	46.7	45.4	0.193851	0.394822	16.9625	0.66167		8.68058	0.74392	1.12635e-05
C14BL29	Ignimbrite	304	73.1	0.31	13.3	2.39	0.03	0.33	1.52	3.67	3.95	0.04	0.4	99	1.07629	1.01711	1.28827	24.3447		11.1	6.66	576	265	6.44	18.1	26.8	55.7	6.73	27.9	5.88	0.68	5.85	1.04	6.03	1.26	3.74	0.55	3.63	0.509	99.8	39.8	0.230824	0.397849	21.4925	0.279559		3.36562	0.721236	6.58803e-06
C14BL31	Ignimbrite	304	73.7	0.29	13.35	2.26	0.03	0.28	1.5	3.66	4.02	0.04	0.33	99.5	1.09836	1.01915	1.2857	22.4045		12.1	7.51	612	246	6.78	17.6	27.3	59.3	7.33	30	6.16	0.79	5.79	1.03	5.75	1.1	3.21	0.49	3.37	0.508	92	29.1	0.226	0.403333	22.4176	0.326087		3.4936	0.722823	7.28377e-06
08Y430	andesitic tuff	310	54.8	0.38	16.74	6.78	0.13	5.15	6.69	2.19	1.75	0.3	3.9	99.66	0.799087	0.946447	3.04262	52		1.7	1.2	612	16.5	0.74	85.5	5.8	11.1	1.44	6.57	1.71	0.55	2.32	0.32	2.26	0.47	1.47	0.2	1.49	0.24	721	12.7	0.112633	0.258752	105.517	0.00911234		0.2075	0.707823
08Y43I	andesitic tuff	310	54.17	0.42	16.73	7.45	0.13	5.06	5.1	2.53	2.23	0.33	5.18	100.09	0.881423	1.0541	2.54176	49		1.69	1.22	525	14.8	0.66	5.19	5.71	10.8	1.45	6.52	1.67	0.54	2.25	0.33	2.24	0.47	1.5	0.23	1.53	0.24	797	13	0.101227	0.259202	91.944	0.00818068		0.2699	0.707828
08Y434	andesitic tuff	310	58.59	0.38	14.29	6.35	0.12	4.59	4.99	2.12	3.34	0.28	4.26	100.29	1.57547	0.882048	2.00928	50		3.26	2.37	868	35.5	1.32	10.5	8.35	16.6	2.18	9.16	2.11	0.68	2.72	0.36	2.37	0.49	1.42	0.21	1.47	0.22	593	12.6	0.144105	0.355895	103.952	0.0154469		0.3672	0.707836
08Y435	andesitic tuff	310	68.54	0.72	14.94	3.69	0.05	0.45	1.05	5.57	3.2	0.16	1.01	100.04	0.574506	1.02692	1.18235	55		13.5	20.8	971	432	11.5	53.3	27.1	44.1	7.87	31.6	6.39	1.21	6.19	0.9	5.79	1.15	3.51	0.51	3.45	0.53	339	30.7	0.363924	0.427215	35.8303	0.0932153		0.6753	0.709105
08Y439	Basaltic andesite	310	50.63	0.77	14.62	8.14	0.35	4.43	10.54	2.05	1.32	0.18	6.3	99.87	0.643902	0.609096	3.04271	43		5.27	8.08	460	121	3.66	13.4	16.5	33.6	4.26	17.4	3.813	1.09	4.25	0.6	3.78	0.79	2.27	0.34	2.17	0.32	356	20.8	0.210345	0.302874	27.8788	0.0488764		0.2475	0.707825
08Y440	Basaltic andesite	310	51.42	0.75	14.63	7.79	0.3	5.95	10.06	2.15	1.24	0.18	4.74	100.26	0.576744	0.630435	2.99634	52		4.89	7.95	478	117	3.59	19.9	15.7	32.2	4.08	16.8	63	1.05	4.29	0.59	3.7	0.76	2.25	0.31	2.21	0.31	367	20.8	0.21369	0.291071	30.4459	0.0457766		0.2148	0.707816
08Y441	Tuff	310	41.42	0.76	12.82	5.43	0.24	4.2	15.12	1.92	0.63	0.24	16.71	100.28	0.328125	0.40851	3.33652	52		3.19	8.69	192	151	4.43	23.6	15.7	34.1	4.39	18.5	4.04	1.09	4.2	0.62	3.67	0.77	223	0.31	2.16	0.32	298	20.4	0.239459	0.172432	12.2293	0.0620805		0.1861	0.707796
08Y443	Rhyolite	310	77.33	0.16	11.64	2.64	0.02	0.89	0.43	1.27	2.54	0.02	2.28	99.67	2	2.06796	2.40222	32		13.9	18.4	308	507	14.7	14.4	46.6	93.4	13.1	53.9	12	2.24	13.2	2.15	14.2	3.05	8.95	1.32	9.03	1.35	52.3	79	0.272727	0.257885	6.60944	1.03059		3.638	0.720814
WXT721	Nb-riched basalt	319	51.91	2.47	14.38	11.6657	0.15	4.21	3.68	3.53	1.07	0.31	6.1	99.65	0.303116	1.05184	2.06358	39		0.976	7.62	725	224	5.11		10.3	27.1	4.03	20.7	5.81	2.08	6.5	0.99	6.21	1.46	3.98	0.532	3.59	0.59	905	39	0.24686	0.0471498	70.3883	0.0228729		0.05824	0.706584	1.1e-05
XT017	Nb-riched basalt	319	53.28	3.56	15.16	13.3319	0.27	3.18	2.59	3.26	1.41	0.41	3.18	100.16	0.432515	1.30569	2.19926	30		0.428	10	309	336	6.74		7.49	21.7	3.61	17.78	4.6	1.53	5	0.94	5.84	1.26	3.55	0.519	3.14	0.482	354	17	0.379078	0.024072	41.255	0.050226		0.1708	0.705518	2.4e-05
P154-3	Nb-riched basalt	319	46.07	2.5	14.43	12.9601	0.3	5.39	8.9	2.9	0.36	0.42	4.68	99.34	0.124138	0.675172	2.79564	43			12.9	296	277			11.3	31.56	5.27	24.7	6.95	2.38	7.98	1.41	8.47	1.8	5.24	0.78	4.67	0.72		44	0	0	26.1947	0		0.08	0.70107	4e-06
P201	Nb-riched basalt	319	51.37	2	15.27	10.5981	0.23	2.47	7.29	3.4	0.55	0.57	5.54	99.76	0.161765	0.784341	2.46674	29			11.1	179	271			17.5	42.13	6.42	26.59	6.8	1.82	7.92	1.24	6.96	1.5	4.47	0.66	4.09	0.6		38	0	0	10.2286	0		0.039	0.70427	2e-06
WXT730	Rhyolite	306	73.8	0.35	12.93	2.23092	0.02	0.23	0.48	4.12	4.52	0.04	1.03	99.79	1.09709	1.0297	1.10676	16		5.99	9.76	623	279	8.66		13.7	32.2	3.76	15.4	3.61	0.766	4.17	0.856	6.64	1.8	5.06	0.799	5.38	0.87	49.1	48	0.562338	0.388961	45.4745	0.313646		0.9	0.70779	6e-06
WXT731	Dacite	306	66.09	0.92	14.6	5.37966	0.09	1.24	3.34	3.91	3.06	0.15	0.85	99.8	0.782609	0.921916	1.49697	29		8.72	11.5	461	326	8.51		21.7	48.2	5.76	25.6	6.2	1.42	6.18	0.962	6.26	1.47	4.06	0.563	4.01	0.64	207	36.9	0.332422	0.340625	21.2442	0.123671		2.85	0.7189	7e-06
WXT-732	Dacite	306	67.95	0.74	14.15	4.76473	0.09	0.87	2.36	4.39	3.2	0.11	1.09	99.85	0.728929	0.943763	1.3231	25		7.99	10.9	494	333	7.4		21.4	48.6	5.59	24.7	5.79	1.25	5.7	0.973	5.81	1.35	3.77	0.536	3.67	0.614	219	37	0.299595	0.323482	23.0841	0.112785		7.68	0.73675	6e-06
WXT-733	Dacite	306	65.91	0.89	14.56	5.45972	0.06	0.91	3.35	3.52	3.84	0.14	1.04	99.82	1.09091	0.906625	1.46217	23		7.56	11.9	559	344	7.32		23	50.7	5.98	26.6	6.3	1.59	6.36	1.04	6.3	1.42	3.84	0.567	3.75	0.624	242	39.6	0.275188	0.284211	24.3043	0.109917		4.99	0.72594	6e-06
WXT-734	Dacite	306	65.74	0.92	14.45	5.73375	0.06	1.12	3.58	3.73	3.19	0.14	1.03	99.82	0.855228	0.896477	1.50553	26		8.13	12.3	482	354	7.51		22.8	51.3	6.22	27.3	6.41	1.58	6.34	1.07	6.41	1.5	4.01	0.613	3.98	0.647	248	40	0.275092	0.297802	21.1404	0.110081		1.234	0.710395	1.3e-05
WXT746	Rhyolite	306	77.05	0.29	11.17	2.40966	0.01	0.42	0.32	1.71	5.11	0.04	1.07	99.77	2.9883	1.2493	1.33643	24		11.91	7.15	830	238	6.57		25.3	54.7	6.15	28.5	6.11	0.88	6.01	1.03	6.39	1.45	4.28	0.571	3.99	0.663	63.7	41.9	0.230526	0.417895	32.8063	0.44741		2.653	0.717056	1.7e-05
WXT742	Adakite	320	62.33	0.59	16.73	4.29944	0.07	2.85	5.94	3.54	1.5	0.08	1.59	99.8	0.423729	0.915668	2.24518	54		3.77	4.89	411	112	2.86		10.5	21.7	2.52	11.1	2.31	0.877	2.16	0.372	2.17	0.45	1.4	0.192	1.32	0.215	432	12.8	0.257658	0.33964	39.1429	0.0256944		0.2596	0.704762	1.6e-05
XT-28	Adakite	320	61.9	0.6	16.71	4.18345	0.07	2.71	5.8	3.74	1.58	0.1	2.12	99.79	0.42246	0.906592	2.12396	54		4.01	4.74	463	130	3.7		11.3	23.3	2.96	11.7	2.49	0.849	2.36	0.406	2.38	0.485	1.34	0.214	1.39	0.24	493	12.8	0.316239	0.342735	40.9735	0.0237323		0.2453	0.704918	2.3e-05
XT-29	Adakite	320	72.36	0.32	13.6	3.1497	0.04	0.35	0.96	4.67	3.07	0.06	1.03	99.76	0.657388	1.0656	1.23477	17		3.88	3.64	863	124	3.2		11.8	20.7	2.21	7.96	1.38	0.388	1.12	0.186	1.19	0.237	0.71	0.111	0.798	0.142	486	6.71	0.40201	0.487437	73.1356	0.0163786		0.4083	0.705729	1.1e-05
XT-27	Adakite	320	62.39	0.66	17.37	4.52619	0.03	3.32	2.62	4.38	1.32	0.05	2.7	99.77	0.30137	1.29527	2.01085	57		4.11	4.94	618	134	3.59		7.89	16.6	2.05	8.08	1.71	0.776	1.83	0.316	1.94	0.394	1.158	0.184	1.27	0.214	432	9.94	0.444307	0.508663	78.327	0.0187037		0.2466	0.704643	9e-06
XT-30	Adakite	320	63.64	0.5	17.4	3.51555	0.06	2.72	4.42	4.11	1.34	0.07	1.78	99.78	0.326034	1.06969	2.11791	58		3.37	3.56	550	119	3.12		10.1	20.6	2.51	9.89	1.99	0.734	1.97	0.329	1.91	0.375	1.08	0.171	1.1	0.181	540	10.2	0.31547	0.340748	54.4554	0.0183148		0.2048	0.705092	1.9e-05
Reference
An, F., Zhu, Y. F., Wei, S. N., and Lai, S. C., 2013, An Early Devonian to Early Carboniferous volcanic arc in North Tianshan, NW China: Geochronological and geochemical evidence from volcanic rocks: Journal of Asian Earth Sciences, v. 78, p. 100-113.
Tang, G. J., Wang, Q., Wyman, D. A., Sun, M., Zhao, Z. H., and Jiang, Z. Q., 2013, Petrogenesis of gold-mineralized magmatic rocks of the Taerbieke area, northwestern Tianshan (western China): Constraints from geochronology, geochemistry and Sr–Nd–Pb–Hf isotopic compositions: Journal of Asian Earth Sciences, v. 74, p. 113-128.
Yu, X. Q., Wang, Z. X., Zhou, X., Xiao, W. F., and Yang, X. P., 2015, Zircon U–Pb geochronology and Sr–Nd isotopes of volcanic rocks from the Dahalajunshan Formation: implications for Late Devonian–Middle Carboniferous tectonic evolution of the Chinese Western Tianshan: International Journal of Earth Sciences, v. 105, no. 5, p. 1637-1661.
Zhu, Y. F., Guo, X., Song, B., Zhang, L. F., and Gu, L., 2009, Petrology, Sr-Nd-Hf isotopic geochemistry and zircon chronology of the Late Palaeozoic volcanic rocks in the southwestern Tianshan Mountains, Xinjiang, NW China: Journal of the Geological Society, v. 166, no. 6, p. 1085-1099.
Wang, X., Cai, K., Sun, M., Xiao, W., Xia, X., Wan, B., Bao, Z., and Wang, Y. J. J. o. A. E. S., 2018, Two contrasting late Paleozoic magmatic episodes in the northwestern Chinese Tianshan Belt, NW China: Implication for tectonic transition from plate convergence to intra-plate adjustment during accretionary orogenesis: Journal of Asian Earth Sciences, v. 153, p. 118-138.
Liu, F., Yang, J., Li, T., Chen, S., Xu, X., Li, J., and Jia, Y., 2011, Geochemical characteristics of Late Carboniferous volcanic rocks in northern Tianshan,Xinjiang,and their geological significance: Geology of China, v. 38, no. 4, p. 868-889.
Wang, Q., Wyman, D., Zhao, Z., Xu, J., Bai, Z., Xiong, X., Dai, T., Li, C., and Chu, Z., 2007, Petrogenesis of Carboniferous adakites and Nb-enriched arc basalts in the Alataw area, northern Tianshan Range (western China): Implications for Phanerozoic crustal growth in the Central Asia orogenic belt: Chemical Geology, v. 236, no. 1-2, p. 42-64.
[truncated: 10 more columns]
